# Supplementary material
Source: publisher figshare collection journal article supplement (https://acs.figshare.com/ndownloader/files/13142870)
Supplement: Supplementary file 1 [file 13142870]

## Supporting Information

### Ab-initio Study of Sodium Insertion in the $\lambda$ - $\text{Mn}_2\text{O}_4$ and dis/ordered $\lambda$ - $\text{Mn}_{1.5}\text{Ni}_{0.5}\text{O}_4$ Spinels

Alexandros Vasileiadis<sup>†</sup>, Brian Carlsen<sup>†</sup>, Niek J. J. de Klerk<sup>†</sup>, Marnix Wagemaker<sup>†</sup>

<sup>†</sup> Storage of Electrochemical Energy (SEE), Department of Radiation Science and Technology, Faculty of Applied Sciences, Delft University of Technology, Mekelweg 15, 2629 JB Delft, The Netherlands.

**A.**

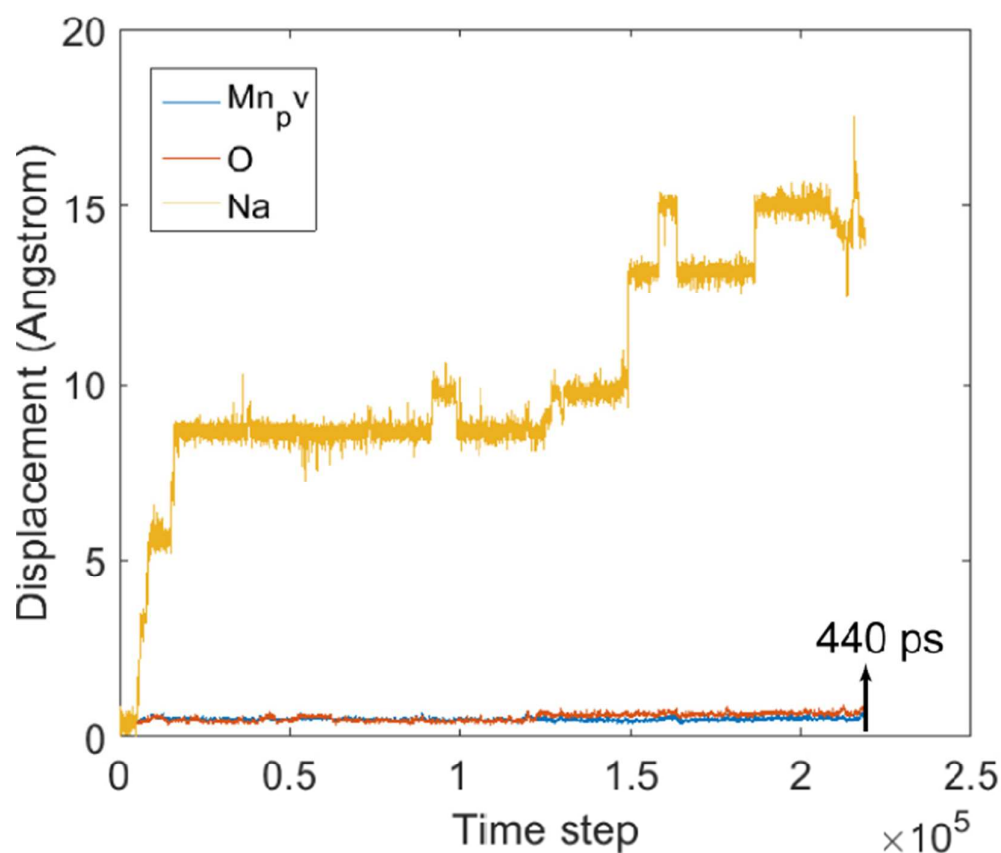

**Figure S1:** Atom displacements for a 440 ps MD simulation of the pure spinel phase at 600 K

**B.**

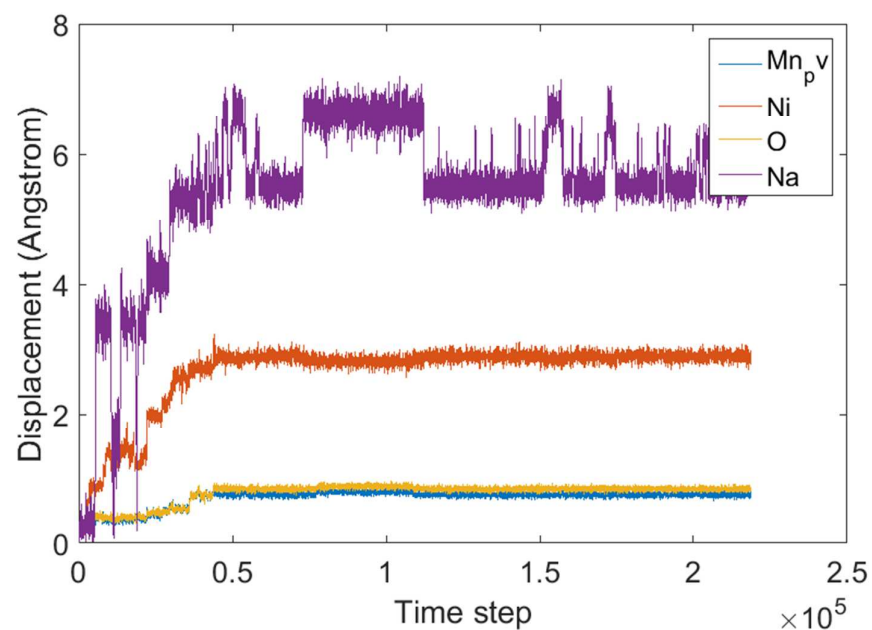

**Figure S2:** Atom displacements for a 440 ps MD simulation of the F2- MNO phase at 600 K

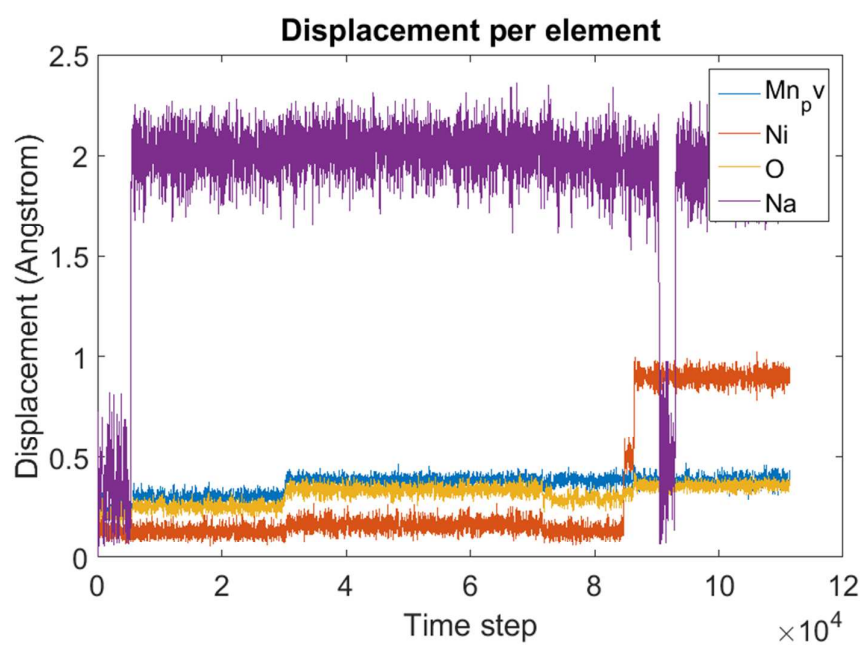

**Figure S3:** Atom displacements for a 240 ps MD simulation of the F2- MNO phase at 300 K

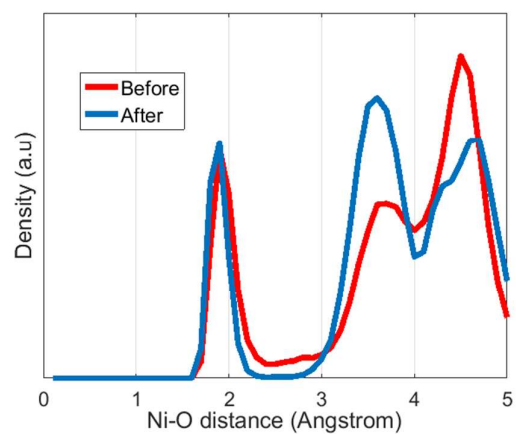

**Figure S4:** Ni - O radial distribution function (RDF) for one of the nickel atoms before and after it moves to the new position

**C**

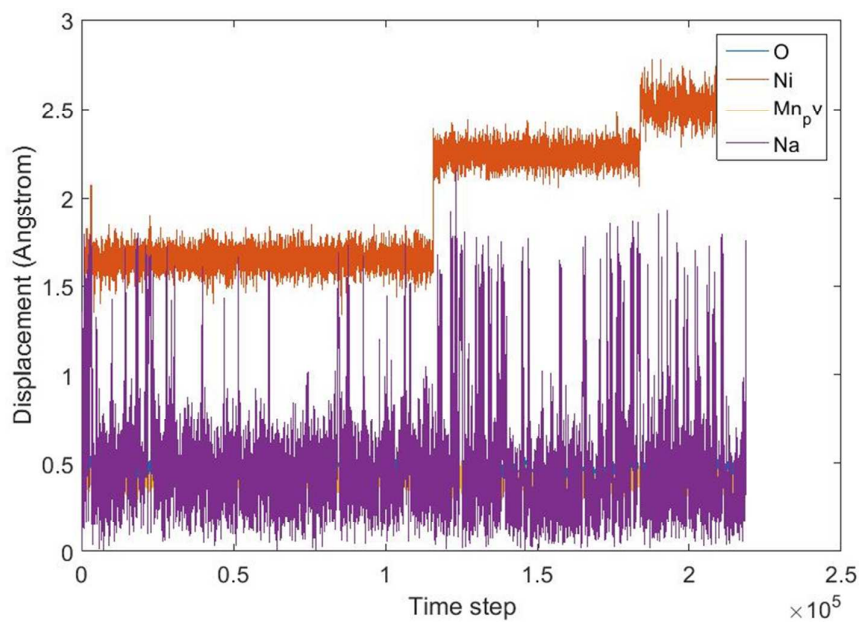

**Figure S5:** Atom displacements for a 440 ps MD simulation of the P- MNO phase at 600 K

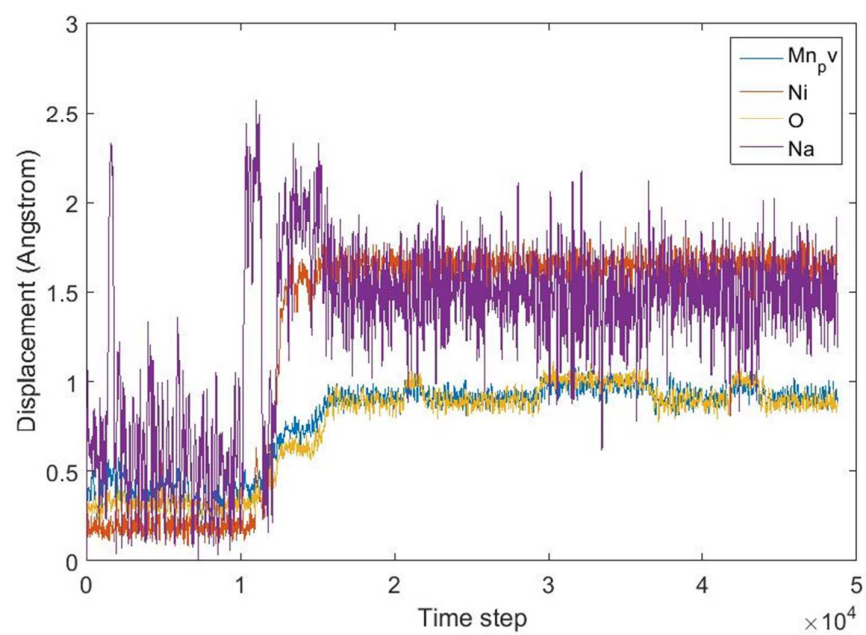

**Figure S6:** Atom displacements for a 100 ps MD simulation of the F1- MNO phase at 600 K
